# Supplementary material
Source: PubMed Central journal article supplement (PMC10851137)
Supplement: jama-e240589-s002.pdf [file jama-e240589-s002.pdf]

\*First name, last name, and suffix (if applicable) are required and will appear in PubMed.

| <b>*Group Name(s): IRIS Collaborators</b> |                   |                              |                  |                                                                                                                                                                                                                      |                                          |                                                         |                                                                                            |
|-------------------------------------------|-------------------|------------------------------|------------------|----------------------------------------------------------------------------------------------------------------------------------------------------------------------------------------------------------------------|------------------------------------------|---------------------------------------------------------|--------------------------------------------------------------------------------------------|
| <b>*First Name and Middle Initial(s)</b>  | <b>*Last Name</b> | <b>*Suffix (eg, Jr, III)</b> | Academic Degrees | Institution                                                                                                                                                                                                          | Location (city, state/province, country) | Role or Contribution, eg, chair, principal investigator | Group (if more than 1 Group listed in the byline) and/or Subgroup (eg, Steering Committee) |
| Raul                                      | Nogueira          |                              | Prof. MD         | Department of Neurology, Marcus Stroke & Neuroscience Center, Grady Memorial Hospital, Emory University School of Medicine, Atlanta, Georgia                                                                         | Atlanta, Georgia                         | Principal investigator                                  | IRIS collaborators                                                                         |
| Qingwu                                    | Yang              |                              | Prof. MD<br>PhD  | Department of Neurology, Xinqiao Hospital and The Second Affiliated Hospital, Army Medical University (Third Military Medical University), Chongqing, China                                                          | Chongqing, China                         | Principal investigator                                  | IRIS collaborators                                                                         |
| Yuji                                      | Matsumaru         |                              | Prof. MD<br>PhD  | Division of Stroke Prevention and Treatment, Department of Neurosurgery, Faculty of Medicine, University of Tsukuba, Ibaraki, Japan                                                                                  | Ibaraki, Japan                           | Principal investigator                                  | IRIS collaborators                                                                         |
| Steven                                    | Bush              |                              | MD               | Department of Radiology, Royal Melbourne Hospital, Parkville, Australia                                                                                                                                              | Parkville, Australia                     | Data and Imaging Committee                              | IRIS collaborators                                                                         |
| Fengli                                    | Li                |                              | MD               | Department of Neurology, Xinqiao Hospital and The Second Affiliated Hospital, Army Medical University (Third Military Medical University), No. 183 Xinqiao Main Street, Shapingba District, Chongqing 400037, China  | Chongqing China                          | Trial Collaborators                                     | IRIS collaborators                                                                         |
| Jiacheng                                  | Huang             |                              | MD               | Department of Neurology, Xinqiao Hospital and The Second Affiliated Hospital, Army Medical University (Third Military Medical University), No. 183 Xinqiao Main Street, Shapingba District, Chongqing, 400037, China | Chongqing China                          | Trial Collaborators                                     | IRIS collaborators                                                                         |

## Supplemental Online Content: Nonauthor Collaborators

\*First name, last name, and suffix (if applicable) are required and will appear in PubMed.

| *First Name and Middle Initial(s) | *Last Name | *Suffix (eg, Jr, III) | Academic Degrees | Institution                                                                                                                                                                                                          | Location (city, state/province, country) | Role or Contribution, eg, chair, principal investigator | Group (if more than 1 Group listed in the byline) and/or Subgroup (eg, Steering Committee) |
|-----------------------------------|------------|-----------------------|------------------|----------------------------------------------------------------------------------------------------------------------------------------------------------------------------------------------------------------------|------------------------------------------|---------------------------------------------------------|--------------------------------------------------------------------------------------------|
| Jiaxing                           | Song       |                       | MD               | Department of Neurology, Xinqiao Hospital and The Second Affiliated Hospital, Army Medical University (Third Military Medical University), No. 183 Xinqiao Main Street, Shapingba District, Chongqing, 400037, China | 400037, China                            | Trial Collaborators                                     | IRIS collaborators                                                                         |
| Bo                                | Hong       |                       | Prof. MD         | Department of Neurovascular Intervention, Clinical Center of Neuroscience, Shanghai General Hospital, Shanghai Jiao Tong University School of Medicine, Shanghai, China                                              | Shanghai, China                          | Trial Collaborators                                     | IRIS collaborators                                                                         |
| Wenhuo                            | Chen       |                       | Prof. MD         | Department of Neurology, Zhangzhou Affiliated Hospital of Fujian Medical University, Zhangzhou, China                                                                                                                | Zhangzhou, China                         | Trial Collaborators                                     | IRIS collaborators                                                                         |
| Ya                                | Peng       |                       | Prof. MD         | Department of Neurosurgery, Third Affiliated Hospital of Soochow University, Changzhou, China                                                                                                                        | Changzhou, China                         | Trial Collaborators                                     | IRIS collaborators                                                                         |
| Hongxing                          | Han        |                       | Prof. MD         | Department of Neurology, Linyi People's Hospital of Qingdao University, Linyi, China                                                                                                                                 | Linyi, China                             | Trial Collaborators                                     | IRIS collaborators                                                                         |
| Liyong                            | Zhang      |                       | Prof. MD         | Department of Neurosurgery, Liaocheng People's Hospital of Shandong First Medical University, Liaocheng, China                                                                                                       | Liaocheng, China                         | Trial Collaborators                                     | IRIS collaborators                                                                         |
| Shouchun                          | Wang       |                       | Prof. MD         | Department of Neurology, First Affiliated Hospital of Jilin University, Changchun, China                                                                                                                             | Changchun, China                         | Trial Collaborators                                     | IRIS collaborators                                                                         |
| Qi                                | Fang       |                       | Prof. MD         | Department of Neurology, First Affiliated Hospital of Soochow University, Suzou, China                                                                                                                               | Suzou, China                             | Trial Collaborators                                     | IRIS collaborators                                                                         |

Supplemental Online Content: Nonauthor Collaborators

\*First name, last name, and suffix (if applicable) are required and will appear in PubMed.

| *First Name and Middle Initial(s) | *Last Name | *Suffix (eg, Jr, III) | Academic Degrees | Institution                                                                                             | Location (city, state/province, country) | Role or Contribution, eg, chair, principal investigator | Group (if more than 1 Group listed in the byline) and/or Subgroup (eg, Steering Committee) |
|-----------------------------------|------------|-----------------------|------------------|---------------------------------------------------------------------------------------------------------|------------------------------------------|---------------------------------------------------------|--------------------------------------------------------------------------------------------|
| Chenghua                          | Xu         |                       | Prof. MD         | Department of Neurology, Taizhou First People's Hospital of Wenzhou, Medical University, Taizhou, China | Taizhou, China                           | Trial Collaborators                                     | IRIS collaborators                                                                         |
| Yongxin                           | Zhang      |                       |                  | Neurovascular Center, Naval Medical University Changhai hospital, Shanghai, China                       | Shanghai, China                          | Trial Collaborators                                     | IRIS collaborators                                                                         |
| Zifu                              | Li         |                       | Prof. MD         | Neurovascular Center, Naval Medical University Changhai hospital, Shanghai, China                       | Shanghai, China                          | Trial Collaborators                                     | IRIS collaborators                                                                         |
| Pengfei                           | Xing       |                       | Prof. MD         | Neurovascular Center, Naval Medical University Changhai hospital, Shanghai, China                       | Shanghai, China                          | Trial Collaborators                                     | IRIS collaborators                                                                         |
| Hongjian                          | Shen       |                       | Prof. MD         | Neurovascular Center, Naval Medical University Changhai hospital, Shanghai, China                       | Shanghai, China                          | Trial Collaborators                                     | IRIS collaborators                                                                         |
| Ping                              | Zhang      |                       | Prof. MD         | Neurovascular Center, Naval Medical University Changhai hospital, Shanghai, China                       | Shanghai, China                          | Trial Collaborators                                     | IRIS collaborators                                                                         |
| Xiaoxi                            | Zhang      |                       | MD               | Neurovascular Center, Naval Medical University Changhai hospital, Shanghai, China                       | Shanghai, China                          | Trial Collaborators                                     | IRIS collaborators                                                                         |
| Stephen                           | Davis      |                       | Prof. MD         | Melbourne Brain Centre @ Royal Melbourne Hospital, University of Melbourne, Parkville, Australia        | Melbourne, Parkville, Australia          | Trial Collaborators                                     | IRIS collaborators                                                                         |
| Huy-Thang                         | Nguyen     |                       | Prof. MD         | The People's Hospital 115, Ho Chi Minh, Vietnam                                                         | Ho Chi Minh, Vietnam                     | Trial Collaborators                                     | IRIS collaborators                                                                         |
| Geoffrey                          | Donnan     |                       | Prof. MD         | Melbourne Brain Centre @ Royal Melbourne Hospital, University of Melbourne, Parkville, Australia        | Melbourne, Parkville, Australia          | Trial Collaborators                                     | IRIS collaborators                                                                         |

## Supplemental Online Content: Nonauthor Collaborators

\*First name, last name, and suffix (if applicable) are required and will appear in PubMed.

| *First Name and Middle Initial(s) | *Last Name | *Suffix (eg, Jr, III) | Academic Degrees | Institution                                                                                                                             | Location (city, state/province, country) | Role or Contribution, eg, chair, principal investigator | Group (if more than 1 Group listed in the byline) and/or Subgroup (eg, Steering Committee) |
|-----------------------------------|------------|-----------------------|------------------|-----------------------------------------------------------------------------------------------------------------------------------------|------------------------------------------|---------------------------------------------------------|--------------------------------------------------------------------------------------------|
| Xiaochuan                         | Huo        |                       | MD               | Department of Interventional Neuroradiology, Beijing Tiantan Hospital, Beijing, China                                                   | Beijing, China                           | Trial Collaborators                                     | IRIS collaborators                                                                         |
| Guangxian                         | Nan        |                       | Prof. MD         | Department of Neurology, China-Japan Union Hospital of Jilin University                                                                 | Jilin University                         | Trial Collaborators                                     | IRIS collaborators                                                                         |
| Andrew                            | Bivard     |                       | Prof. MD         | Melbourne Brain Centre @ Royal Melbourne Hospital, University of Melbourne, Parkville, Australia                                        | Melbourne, Parkville, Australia          | Trial Collaborators                                     | IRIS collaborators                                                                         |
| Henry                             | Ma         |                       | Prof. MD         | Department of Neurology, Monash Medical Centre, Australia                                                                               | Clayton, Australia                       | Trial Collaborators                                     | IRIS collaborators                                                                         |
| Vu Dang                           | Luu        |                       | Prof. MD         | Radiology Centre, Bach Mai Hospital, Vietnam                                                                                            | Bach Mai, Vietnam                        | Trial Collaborators                                     | IRIS collaborators                                                                         |
| Bruce                             | Campbell   |                       | Prof. PhD        | Melbourne Brain Centre @ Royal Melbourne Hospital, University of Melbourne, Parkville, Australia                                        | Melbourne, Parkville, Australia          | Trial Collaborators                                     | IRIS collaborators                                                                         |
| Bart J                            | Emmer      |                       | MD PhD           | Department of Radiology and Nuclear Medicine, Amsterdam University Medical Centers, University of Amsterdam, Amsterdam, the Netherlands | Amsterdam, the Netherlands               | Trial Collaborators                                     | IRIS collaborators                                                                         |
| Jonathan M                        | Coutinho   |                       | MD PhD           | Department of Neurology, Amsterdam University Medical Centers, University of Amsterdam, Amsterdam, the Netherlands                      | Amsterdam, the Netherlands               | Trial Collaborators                                     | IRIS collaborators                                                                         |
| Natalie E                         | LeCouffe   |                       | MD               | Department of Neurology, Amsterdam University Medical Centers, University of Amsterdam, Amsterdam, the Netherlands                      | Amsterdam, the Netherlands               | Trial Collaborators                                     | IRIS collaborators                                                                         |
| Diederik W J                      | Dippel     |                       | Prof. MD PhD     | Department of Neurology, Erasmus Medical Center, Rotterdam, the Netherlands                                                             | Rotterdam, the Netherlands               | Trial Collaborators                                     | IRIS collaborators                                                                         |

## Supplemental Online Content: Nonauthor Collaborators

\*First name, last name, and suffix (if applicable) are required and will appear in PubMed.

| *First Name and Middle Initial(s) | *Last Name | *Suffix (eg, Jr, III) | Academic Degrees | Institution                                                                                   | Location (city, state/province, country) | Role or Contribution, eg, chair, principal investigator | Group (if more than 1 Group listed in the byline) and/or Subgroup (eg, Steering Committee) |
|-----------------------------------|------------|-----------------------|------------------|-----------------------------------------------------------------------------------------------|------------------------------------------|---------------------------------------------------------|--------------------------------------------------------------------------------------------|
| Aad van der                       | Lugt       |                       | Prof. MD PhD     | Department of Radiology, Erasmus Medical Center, Rotterdam, the Netherlands                   | Rotterdam, the Netherlands               | Trial Collaborators                                     | IRIS collaborators                                                                         |
| Vincent                           | Costalat   |                       | MD PhD           | Department of Radiology, Centre Hospitalier Universitaire de Montpellier, Montpellier, France | Montpellier, France                      | Trial Collaborators                                     | IRIS collaborators                                                                         |
| Geert                             | Lycklama   |                       | MD PhD           | Department of Radiology, Haaglanden Medical Center, The Hague, the Netherlands                | The Hague, the Netherlands               | Trial Collaborators                                     | IRIS collaborators                                                                         |
| Jeannette                         | Hofmeijer  |                       | MD PhD           | Department of Neurology, Rijnstate Hospital, Arnhem, the Netherlands                          | Arnhem, the Netherlands                  | Trial Collaborators                                     | IRIS collaborators                                                                         |
| Anouk van                         | Norden     |                       | MD PhD           | Department of Neurology, Amphia Hospital, Breda, the Netherlands                              | Breda, the Netherlands                   | Trial Collaborators                                     | IRIS collaborators                                                                         |
| Toshiaki                          | Otsuka     |                       | MD PhD           | Department of Hygiene and Public Health, Nippon Medical School, Tokyo, Japan                  | Tokyo, Japan                             | Trial Collaborators                                     | IRIS collaborators                                                                         |
| Masataka                          | Takeuchi   |                       | MD PhD           | Department of Neurosurgery, Seisho Hospital, Kanagawa, Japan                                  | Kanagawa, Japan                          | Trial Collaborators                                     | IRIS collaborators                                                                         |
| Masafumi                          | Morimoto   |                       | MD PhD           | Department of Neurosurgery, Yokohama Shintoshu Neurosurgery Hospital, Kanagawa, Japan         | Kanagawa, Japan                          | Trial Collaborators                                     | IRIS collaborators                                                                         |
| Ryuzaburo                         | Kanazawa   |                       | MD PhD           | Department of Neurosurgery, Nagareyama Central Hospital, Chiba, Japan                         | Chiba, Japan                             | Trial Collaborators                                     | IRIS collaborators                                                                         |
| Yohei                             | Takayama   |                       | MD               | Department of Neurology, Akiyama Neurosurgical Hospital, Kanagawa, Japan                      | Kanagawa, Japan                          | Trial Collaborators                                     | IRIS collaborators                                                                         |
| Yuki                              | Kamiya     |                       | MD               | Department of Endovascular Neurosurgery, Toranomon Hospital, Tokyo, Japan                     | Tokyo, Japan                             | Trial Collaborators                                     | IRIS collaborators                                                                         |

## Supplemental Online Content: Nonauthor Collaborators

\*First name, last name, and suffix (if applicable) are required and will appear in PubMed.

| *First Name and Middle Initial(s) | *Last Name | *Suffix (eg, Jr, III) | Academic Degrees | Institution                                                                                                                                                    | Location (city, state/province, country) | Role or Contribution, eg, chair, principal investigator | Group (if more than 1 Group listed in the byline) and/or Subgroup (eg, Steering Committee) |
|-----------------------------------|------------|-----------------------|------------------|----------------------------------------------------------------------------------------------------------------------------------------------------------------|------------------------------------------|---------------------------------------------------------|--------------------------------------------------------------------------------------------|
| Keigo                             | Shigeta    |                       | MD               | Department of Neurosurgery, National Hospital Organization Disaster Medical Center, Tokyo, Japan                                                               | Tokyo, Japan                             | Trial Collaborators                                     | IRIS collaborators                                                                         |
| Seiji                             | Okubo      |                       | MD PhD           | Department of Cerebrovascular Medicine, NTT Medical Center Tokyo, Tokyo, Japan                                                                                 | Tokyo, Japan                             | Trial Collaborators                                     | IRIS collaborators                                                                         |
| Mikito                            | Hayakawa   |                       | MD               | Division of Stroke Prevention and Treatment, Department of Neurosurgery, Faculty of Medicine, University of Tsukuba, Ibaraki, Japan                            | Ibaraki, Japan                           | Trial Collaborators                                     | IRIS collaborators                                                                         |
| Christophe                        | Cognard    |                       | MD PhD           | Department of Diagnostic and Therapeutic Neuroradiology, Centre Hospitalier Universitaire de Toulouse, Toulouse, France                                        | Toulouse, France                         | Trial Collaborators                                     | IRIS collaborators                                                                         |
| Simon                             | Jung       |                       | MD               | Department of Neurology, University Hospital Bern, Inselspital, University of Bern, Stroke Research Center Bern, Freiburgstrasse 8, CH-3010, Bern, Switzerland | Bern, Switzerland                        | Trial Collaborators                                     | IRIS collaborators                                                                         |
| Marnat                            | Gaultier   |                       | MD               | Department of Interventional and Diagnostic Neuroradiology, CHU Bordeaux, University of Bordeaux, Bordeaux, France.                                            | Bordeaux, France                         | Trial Collaborators                                     | IRIS collaborators                                                                         |
| Igor                              | Sibon      |                       | MD               | Stroke Unit, CHU Bordeaux, University of Bordeaux, Bordeaux, France.                                                                                           | Bordeaux, France                         | Trial Collaborators                                     | IRIS collaborators                                                                         |
| Romain                            | Bourcier   |                       | Prof. MD         | Department of Diagnostic and Interventional Neuroradiology, Centre Hospitalier Universitaire de Nantes, Nantes Université, Nantes, France .                    | Nantes, France                           | Trial Collaborators                                     | IRIS collaborators                                                                         |

## Supplemental Online Content: Nonauthor Collaborators

\*First name, last name, and suffix (if applicable) are required and will appear in PubMed.

| *First Name and Middle Initial(s) | *Last Name   | *Suffix (eg, Jr, III) | Academic Degrees | Institution                                                                                            | Location (city, state/province, country) | Role or Contribution, eg, chair, principal investigator | Group (if more than 1 Group listed in the byline) and/or Subgroup (eg, Steering Committee) |
|-----------------------------------|--------------|-----------------------|------------------|--------------------------------------------------------------------------------------------------------|------------------------------------------|---------------------------------------------------------|--------------------------------------------------------------------------------------------|
| Solene de                         | Gaalon       |                       | MD               | Department of Neurology, Centre Hospitalier Universitaire de Nantes, Nantes Université, Nantes, France | Nantes, France                           | Trial Collaborators                                     | IRIS collaborators                                                                         |
| Chrysanthi                        | Papagiannaki |                       | MD               | Department of Radiology, CHU Rouen, Rouen, France                                                      | Rouen, France                            | Trial Collaborators                                     | IRIS collaborators                                                                         |
| Margaux                           | Lefebvre     |                       | MD               | Department of Neurology, CHU Rouen, Rouen, France                                                      | Rouen, France                            | Trial Collaborators                                     | IRIS collaborators                                                                         |
| David S                           | Liebeskind   |                       | Prof. MD         | the Department of Neurology, University of California, Los Angeles, Los Angeles                        | Los Angeles, California, USA             | Trial Collaborators                                     | IRIS collaborators                                                                         |
