# Supplementary material
Source: PubMed Central journal article supplement (PMC10851137)
Supplement: jama-e240589-s003.pdf [file jama-e240589-s003.pdf]

## Data Sharing Statement

Kaesmacher. Time to Treatment With Intravenous Thrombolysis Before Thrombectomy and Functional Outcomes in Acute Ischemic Stroke. *JAMA*. Published February 07, 2024.

doi:10.1001/jama.2024.0589

### Data

**Data available:** No

### Additional Information

**Explanation for why data not available:** Data from the IRIS pooling are currently not publicly available but are planned to be made available in the future. A deidentified dataset and data dictionary will be made accessible. The timing of this availability and criteria for gaining access have not been determined. Requests regarding data access should be made to Professor Yvo Roos (Amsterdam UMC, Amsterdam, The Netherlands, [y.b.roos@amsterdamumc.nl](mailto:y.b.roos@amsterdamumc.nl)).
